# Supplementary material for: Structures of LaH 10 , EuH 9 , and UH 8 superhydrides rationalized by electron counting and Jahn–Teller distortions in a covalent cluster model
Source: Royal Society of Chemistry journal article supplement (doi:10.1039/d3sc00900a), 2023-01-01
Supplement: d3sc00900a1.pdf [file d3sc00900a1.pdf]

# Structures of $\text{LaH}_{10}$ , $\text{EuH}_9$ , and $\text{UH}_8$ superhydrides rationalized by electron counting and Jahn-Teller distortions in a covalent cluster model

Harry W. T. Morgan\* and Anastassia N. Alexandrova

*Department of Chemistry and Biochemistry, University of California, Los Angeles, Los Angeles, California 90095-1569, United States*

E-mail: [harrywtmorgan@g.ucla.edu](mailto:harrywtmorgan@g.ucla.edu)

## Structural optimizations of $[\text{EuH}_9]^-$ and $[\text{LaH}_{10}]^+$

To test our theory that the bond-compression distortion in  $\text{EuH}_9$  is driven by the electron count of the  $\text{H}_8$  cluster, we optimized the structures of  $[\text{EuH}_9]^-$  and  $[\text{LaH}_{10}]^+$ . The optimizations were performed at 150 GPa with a uniform background charge to compensate the added/removed electrons, using the NELECT method in VASP. According to our theory, if  $[\text{LaH}_{10}]^+$  has only two electrons on  $\text{H}_8$  then it should be susceptible to the same Jahn-Teller distortion as  $\text{EuH}_{10}$  and should undergo axial compression, while if  $[\text{EuH}_9]^-$  has three electrons on  $\text{H}_8$  then all the H-H bond lengths in the cluster should be equal. The optimized structure of  $[\text{LaH}_{10}]^+$  is as predicted - the  $\text{H}_8$  cluster is compressed in one direction, to a similar extent as in  $\text{EuH}_{10}$ . However, the optimized structure of  $[\text{EuH}_9]^-$  has the same distortion pattern as  $\text{EuH}_9$ , with bond lengths and angles distorted, and the same structure is reached whether the initial structure is distorted  $\text{EuH}_9$  or more symmetrical  $\text{LaH}_9$  (which

has angle distortions only). We suspect that these charged systems are not well behaved because of the substantial uniform background charge - one electron per formula unit must be added or removed, and the calculations were performed at a pressure of 150 GPa where the lattices are significantly compressed. For  $[\text{EuH}_9]^-$  this is likely to lead to delocalization of the added electrons, due to the uniform positive charge, in which case it is not localized on  $\text{H}_8$  and will not remove the Jahn-Teller instability.

## Supplementary figures

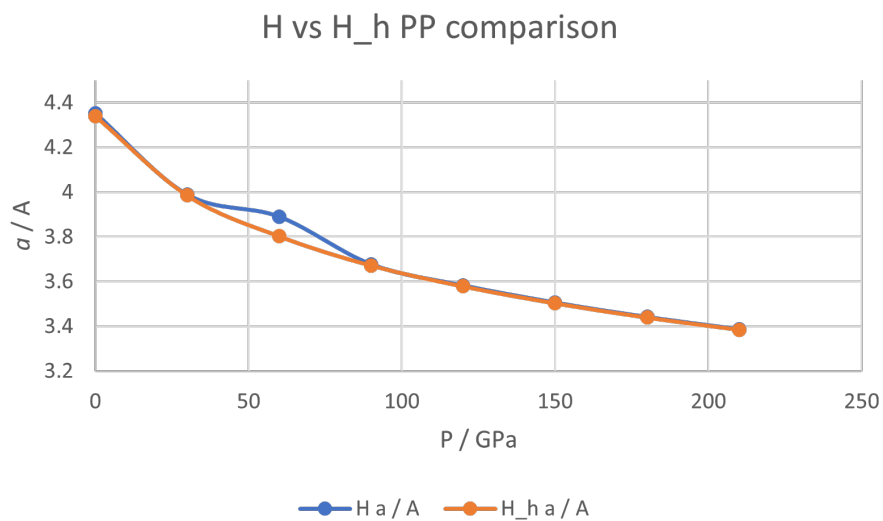

Figure S1: Optimized lattice parameter  $a$  for  $\text{CaH}_6$  vs pressure with the standard (“H”, blue) and hard (“H\_h”, orange) pseudopotentials from the VASP PAW-PBE library.

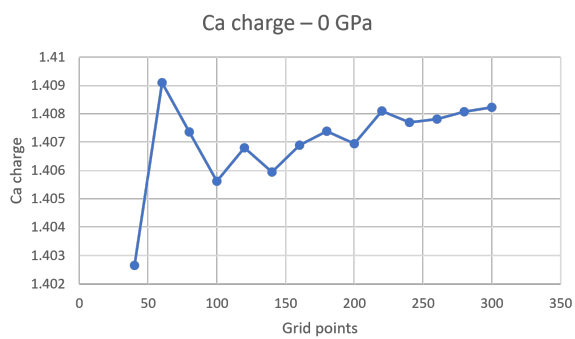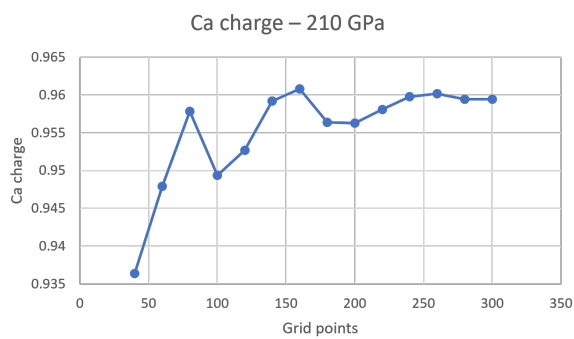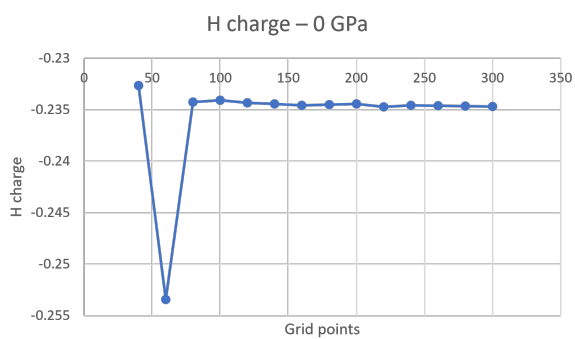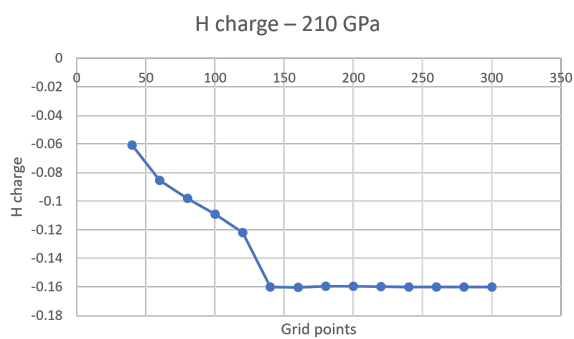

Figure S2: QTAIM atomic charges for  $\text{CaH}_6$  at 0 and 210 GPa as a function of  $\text{NG}(X,Y,Z)F$ , the number of points in the fine FFT grid.

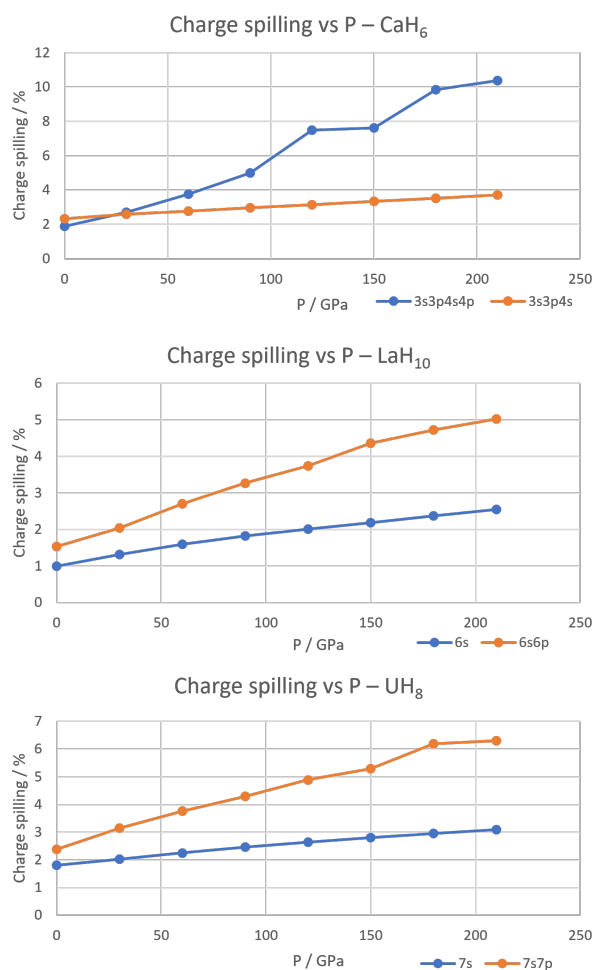

Figure S3: Charge spilling (%) vs P (GPa) of LOBSTER projections of CaH<sub>6</sub>, LaH<sub>10</sub>, and UH<sub>8</sub> with and without unoccupied *p* orbitals on the metal (blue and orange, respectively)

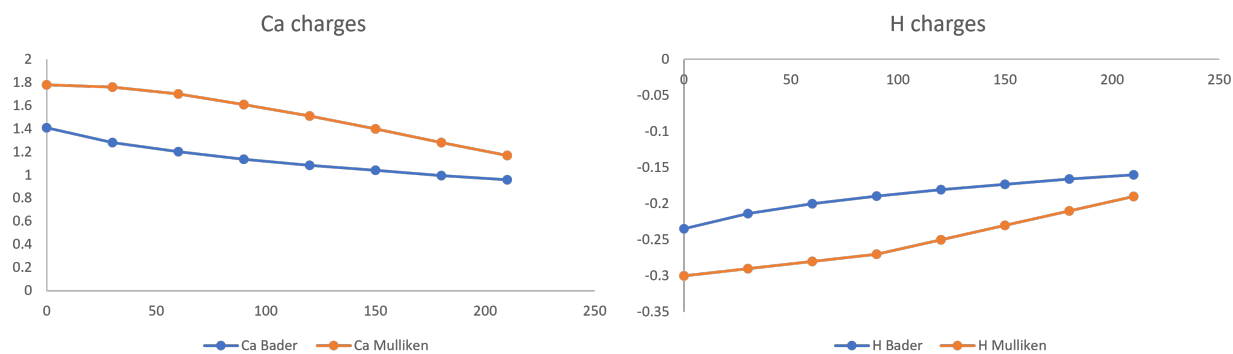

Figure S4: Atomic charges vs pressure (GPa) for CaH<sub>6</sub> using the Bader (blue) and Mulliken (orange) methods.

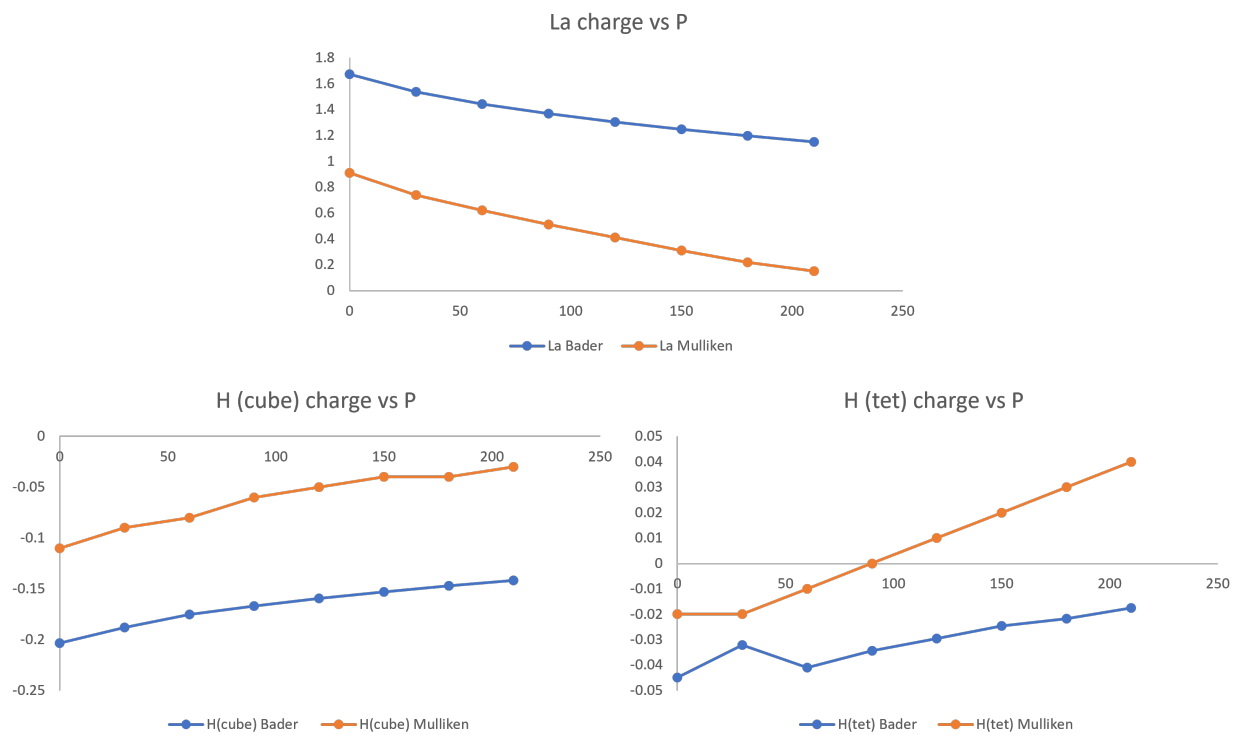

Figure S5: Atomic charges vs pressure (GPa) for LaH<sub>10</sub> using the Bader (blue) and Mulliken (orange) methods.

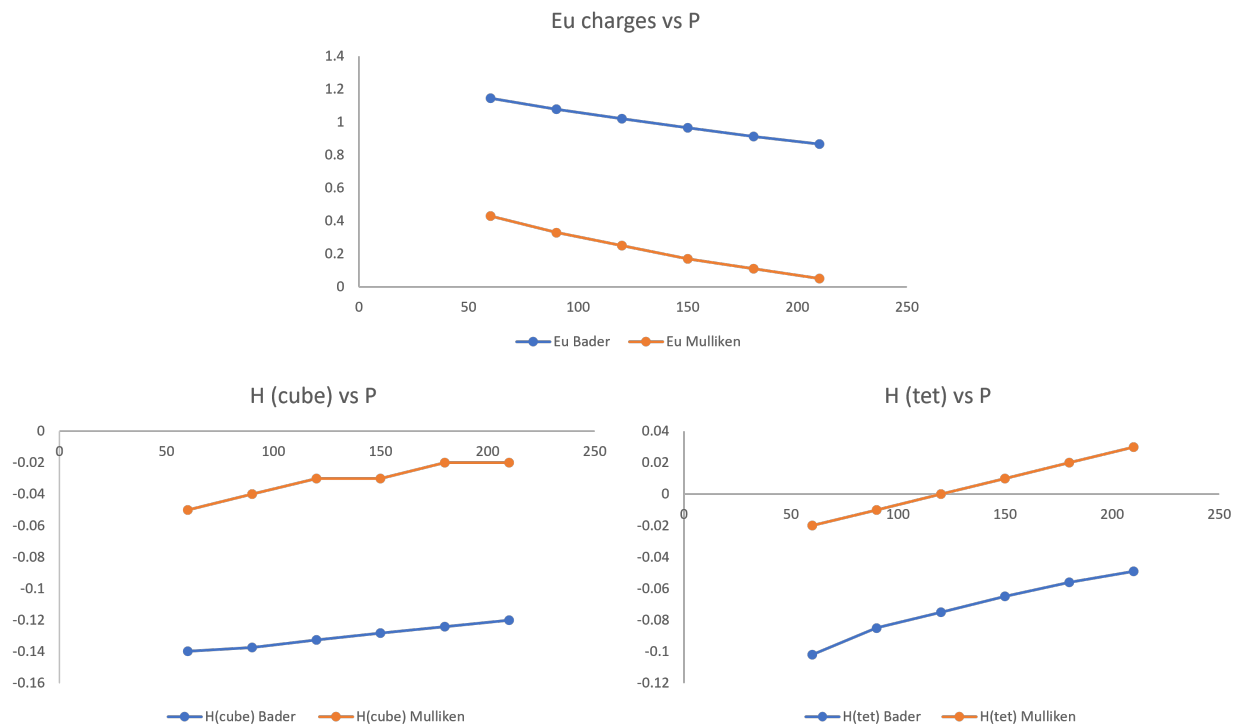

Figure S6: Atomic charges vs pressure (GPa) for EuH<sub>9</sub> using the Bader (blue) and Mulliken (orange) methods.

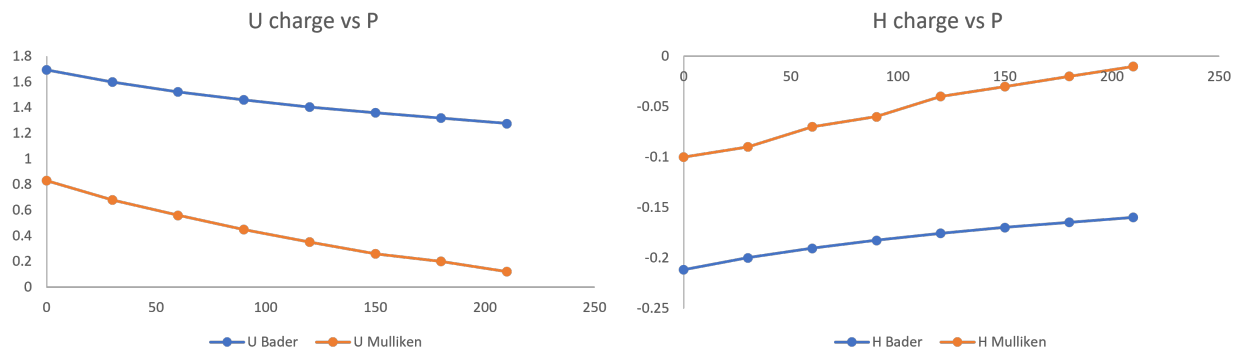

Figure S7: Atomic charges vs pressure (GPa) for UH<sub>8</sub> using the Bader (blue) and Mulliken (orange) methods.

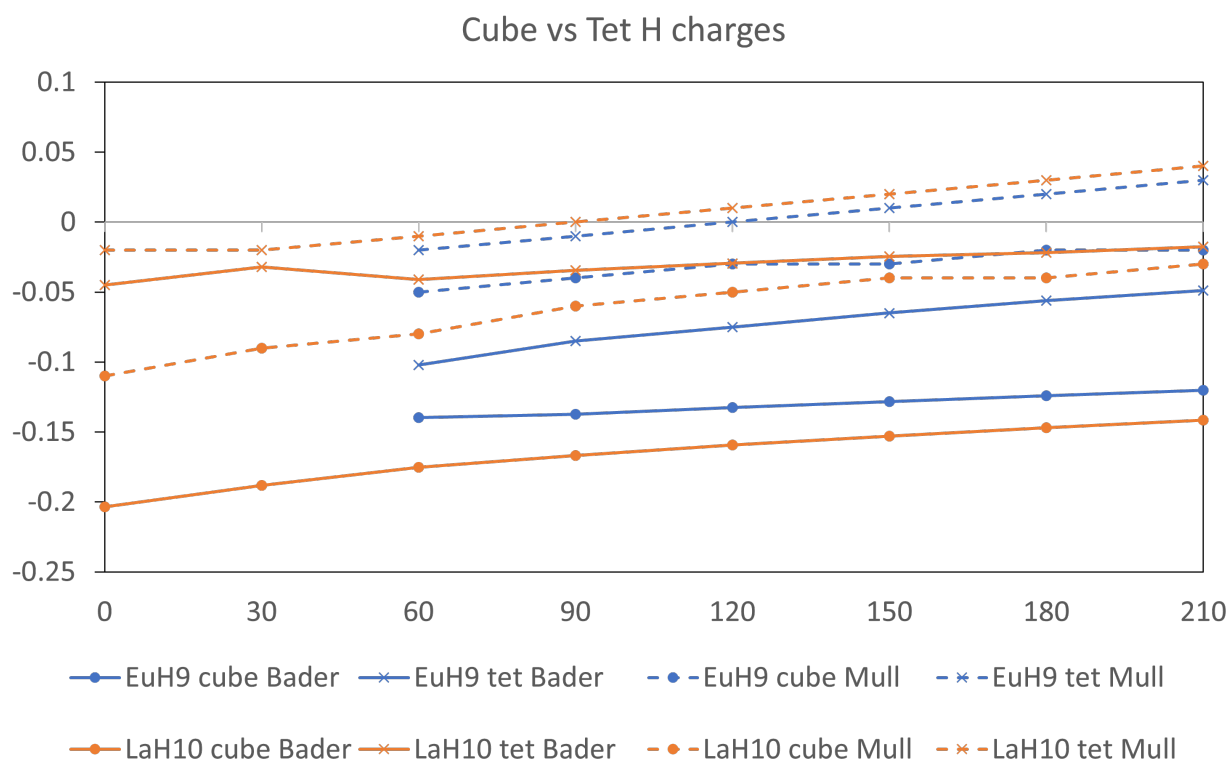

Figure S8: Atomic charges for hydrogen in cube (circles) and tetrahedral (crosses) sites for  $\text{EuH}_9$  (blue) and  $\text{LaH}_{10}$  (orange) using Bader (solid lines) and Mulliken (dashed lines) analysis.

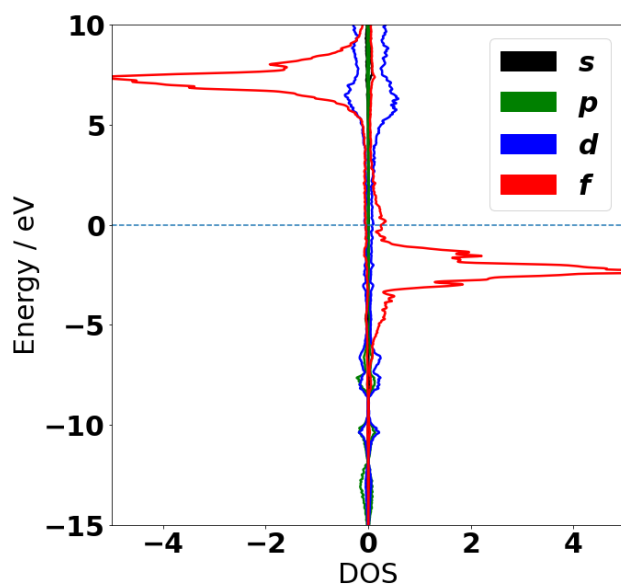

Figure S9: Projected density of states for Eu in  $\text{EuH}_9$  at 150 GPa.  $s$  states are shown by the black curve,  $p$  by green,  $d$  by blue, and  $f$  by red. The spin-up channel is denoted by positive DOS values and the spin-down channel by negative DOS. The Fermi energy is set to 0 on the energy scale.



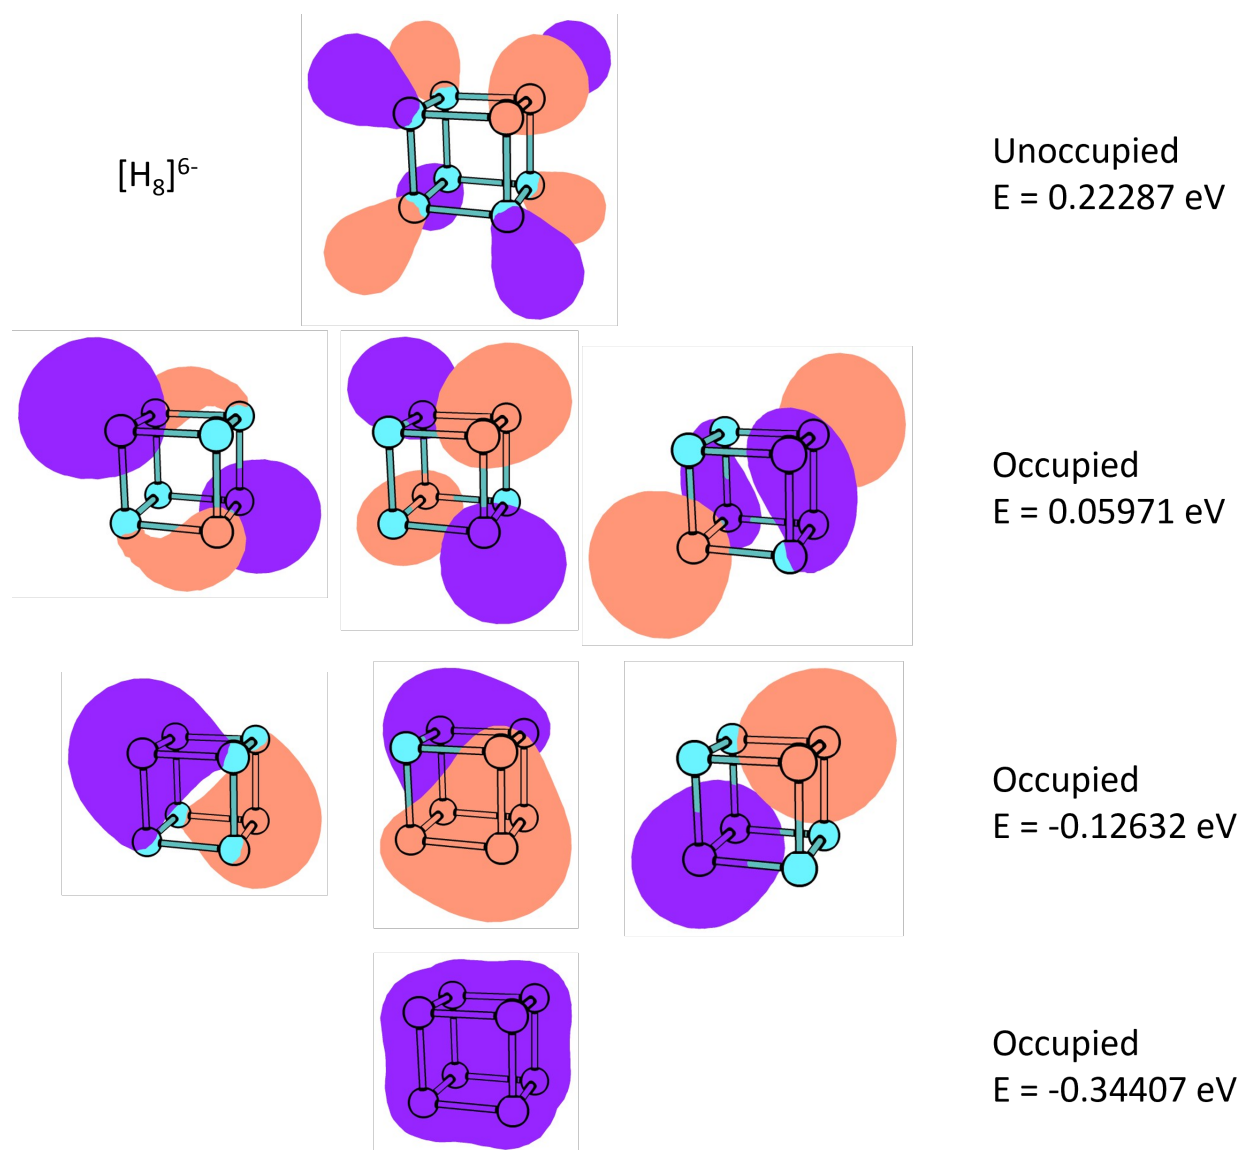

Figure S10: Calculated molecular orbitals for  $[\text{H}_8]^{6-}$  using the geometry from the optimized structure of  $\text{UH}_8$  at 150 GPa.

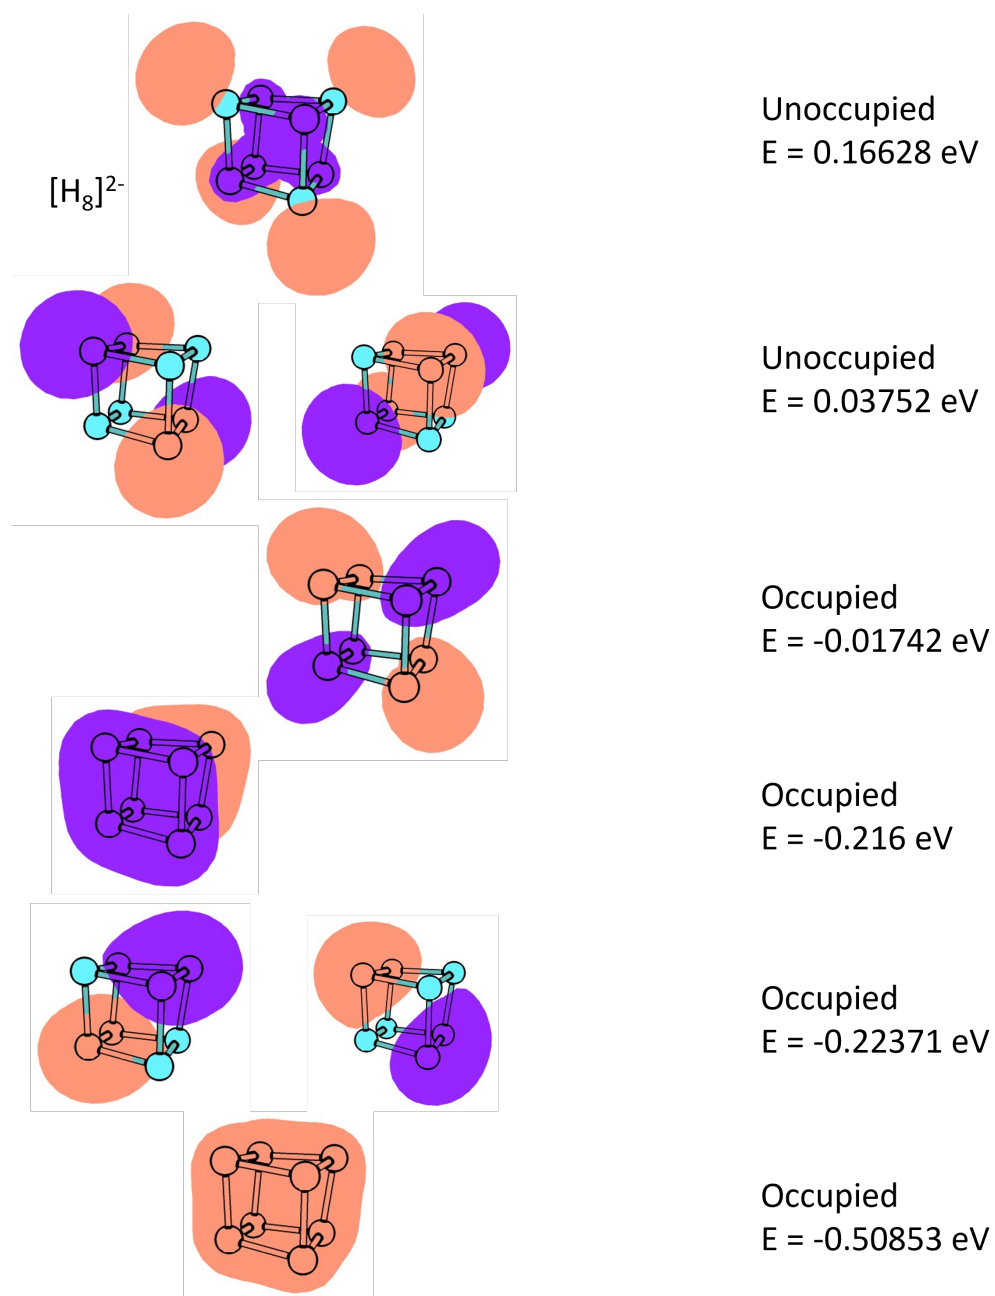

Figure S11: Calculated molecular orbitals for [H<sub>8</sub>]<sup>2-</sup> using the geometry from the optimized structure of EuH<sub>9</sub> at 150 GPa.

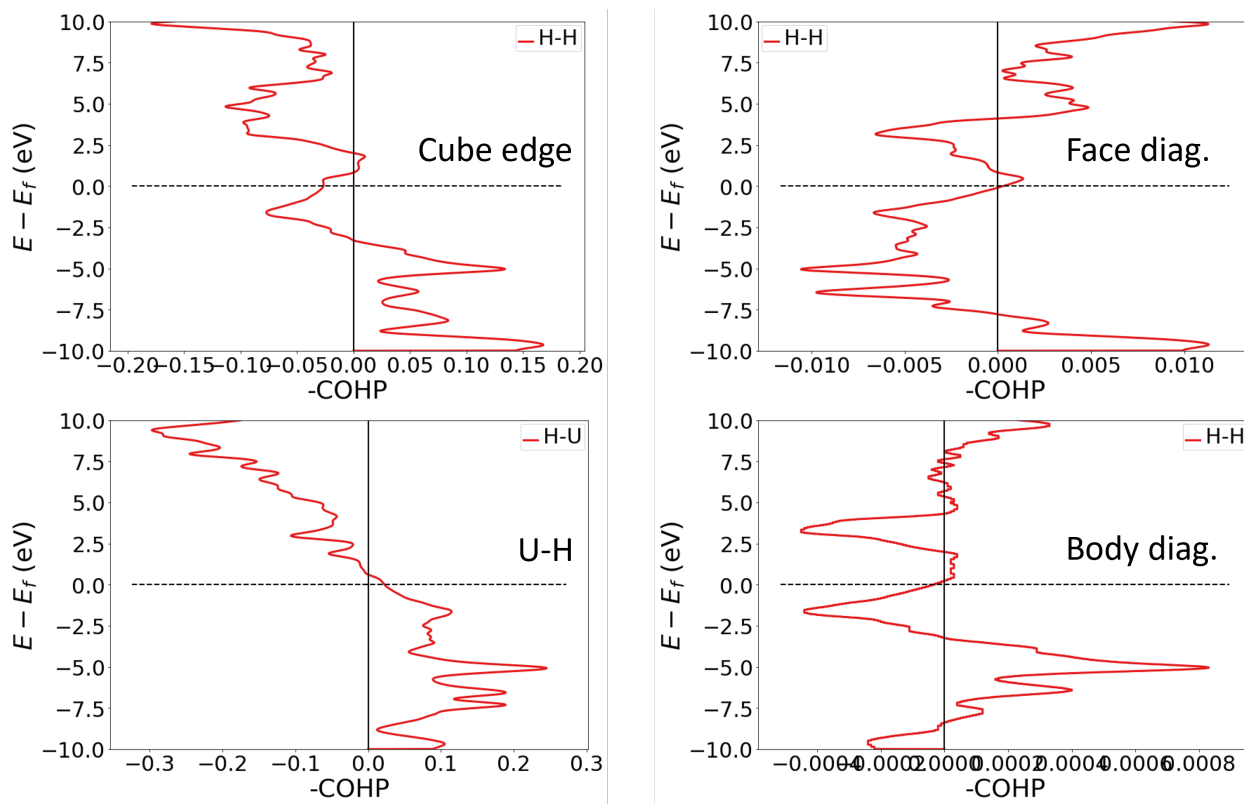

Figure S12: COHP plots for  $\text{UH}_8$  at 0 GPa

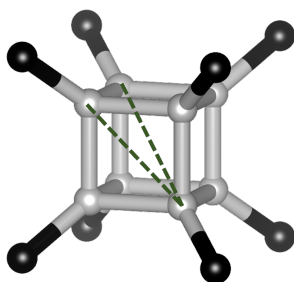

Face diagonal

Body diagonal

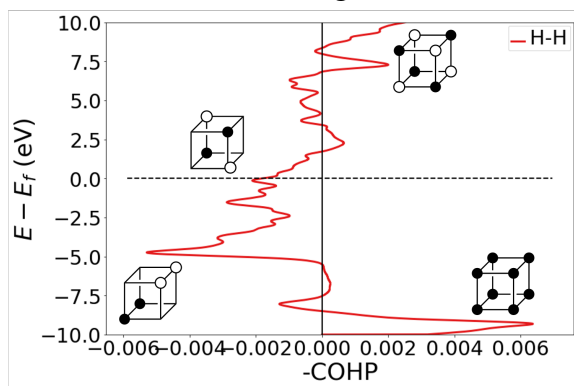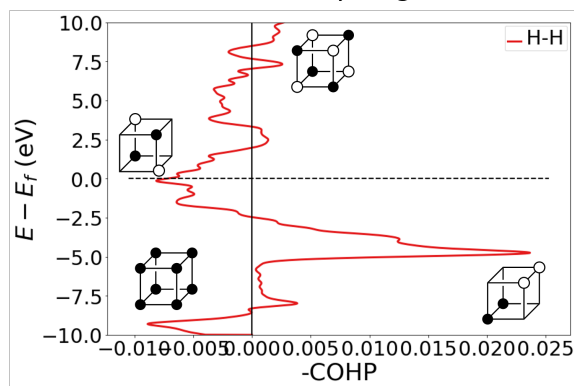

Signs **correct** for face diagonal

Signs **incorrect** for body diagonal

Abs. COHPs  $\sim 25\%$  of nearest neighbour values

Abs. COHPs  $\sim 10\%$  of nearest neighbour values

Figure S13: COHPs for H-H pairs along the diagonals of the  $H_8$  cube in  $LaH_{10}$  at 0 GPa . Peaks are annotated with corresponding molecular orbital cartoons to show bonding/antibonding relationships.

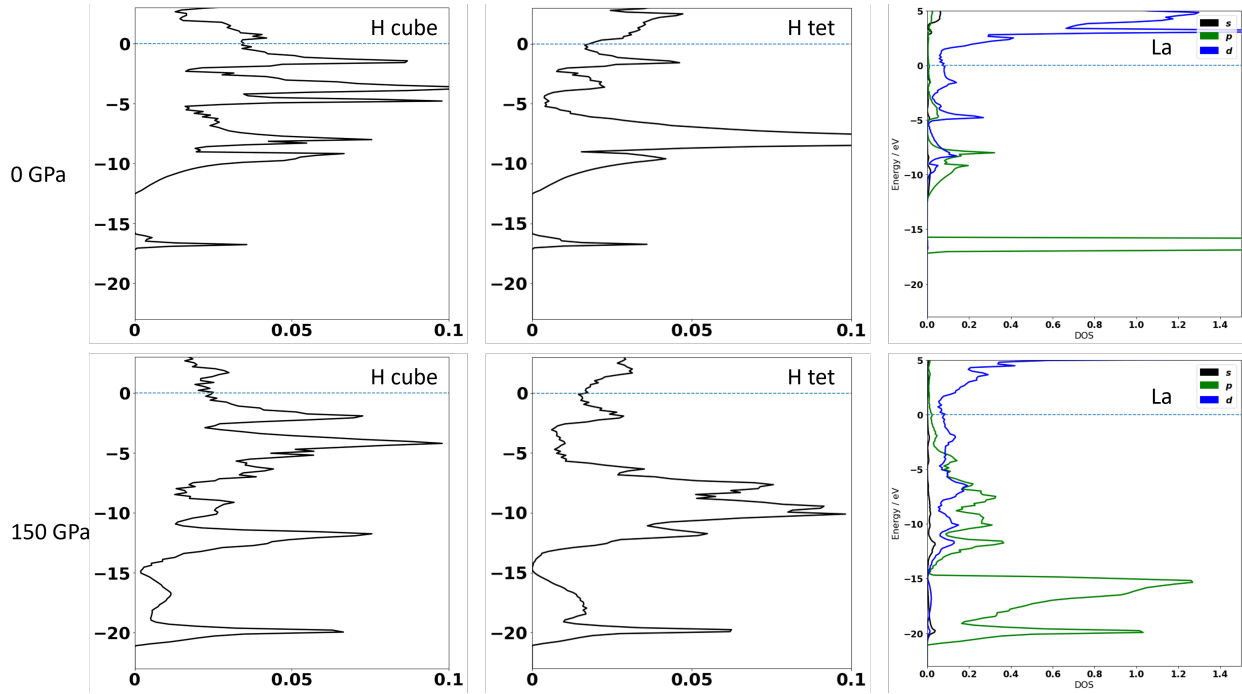

Figure S14: PDOS plots for H (cube), H (tet), and La in  $\text{LaH}_{10}$  at 0 and 150 GPa (upper and lower rows respectively). The La PDOS is resolved into  $s$  (black),  $p$  (green), and  $d$  (blue) contributions. Increasing pressure from 0 to 150 GPa causes largely uniform broadening of the DOS peaks, but the essential features of each atom and the distinctions between atoms are preserved across the pressure range.

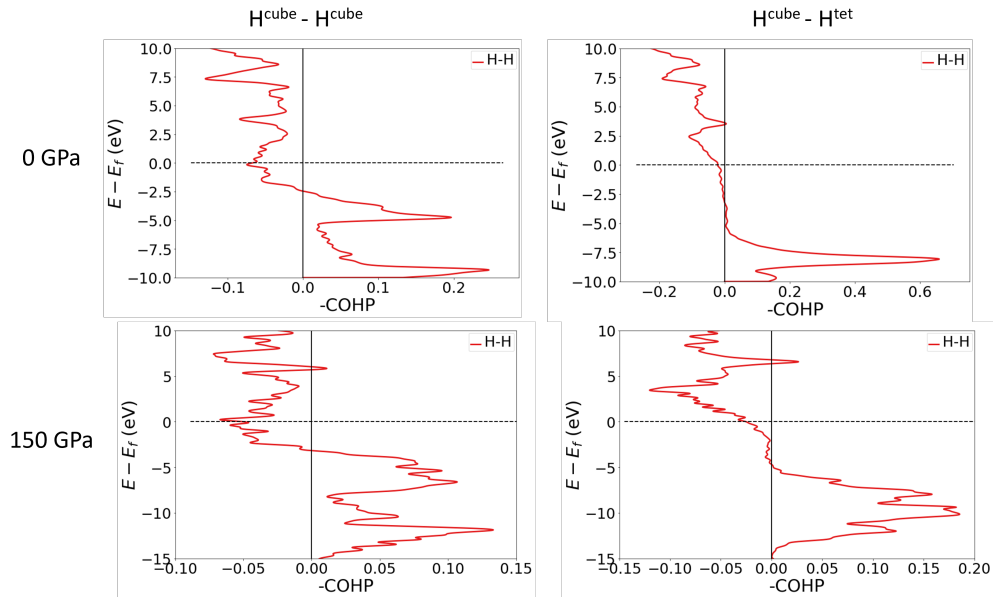

Figure S15: COHP plots for  $\text{H}^{\text{cube}}$  and  $\text{H}^{\text{tet}}$  pairs in  $\text{LaH}_{10}$  at 0 and 150 GPa. Due to peak broadening under pressure, the 150 GPa plots have a wider energy range than the 0 GPa plots.

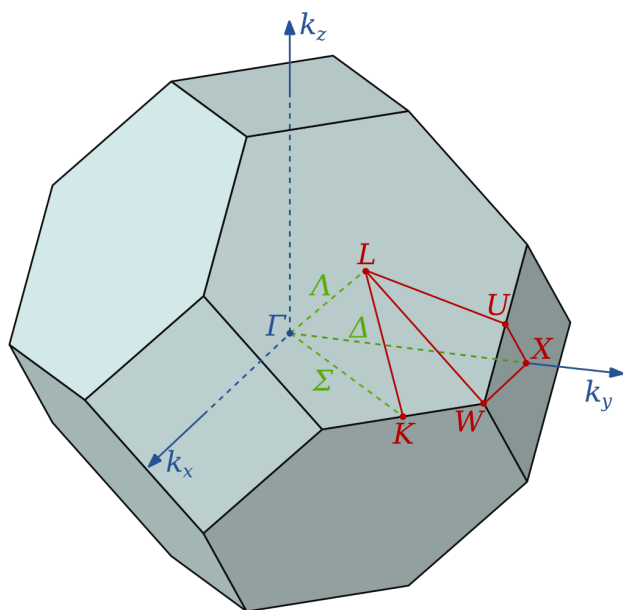

Figure S16: Brillouin zone of  $Fm\bar{3}m$ - $\text{LaH}_{10}$  highlighting high-symmetry k-points. Image source: [https://commons.wikimedia.org/wiki/File:Brillouin\\_Zone\\_\(1st,\\_FCC\).svg](https://commons.wikimedia.org/wiki/File:Brillouin_Zone_(1st,_FCC).svg)
